# Supplementary material for: Utilising problematic waste to detect toxic gas release in the environment: fabricating a NiO doped CuO nanoflake based ammonia sensor from e-waste
Source: Royal Society of Chemistry journal article supplement (doi:10.1039/d1na00743b), 2022-01-01
Supplement: d1na00743b1.pdf [file d1na00743b1.pdf]

## Utilising problematic waste to detect toxic gas release in the environment: fabricating NiO doped CuO nanoflakes based ammonia sensor from e-waste

Rumana Hossain\*§, Kamrul Hassan§, Veena Sahajwalla

Centre for Sustainable Materials Research and Technology, SMaRT@UNSW

School of Materials Science and Engineering

UNSW Sydney, Australia

\*Corresponding author: [r.hossain@unsw.edu.au](mailto:r.hossain@unsw.edu.au)

§Authors have equal contributions.

### Supplementary:

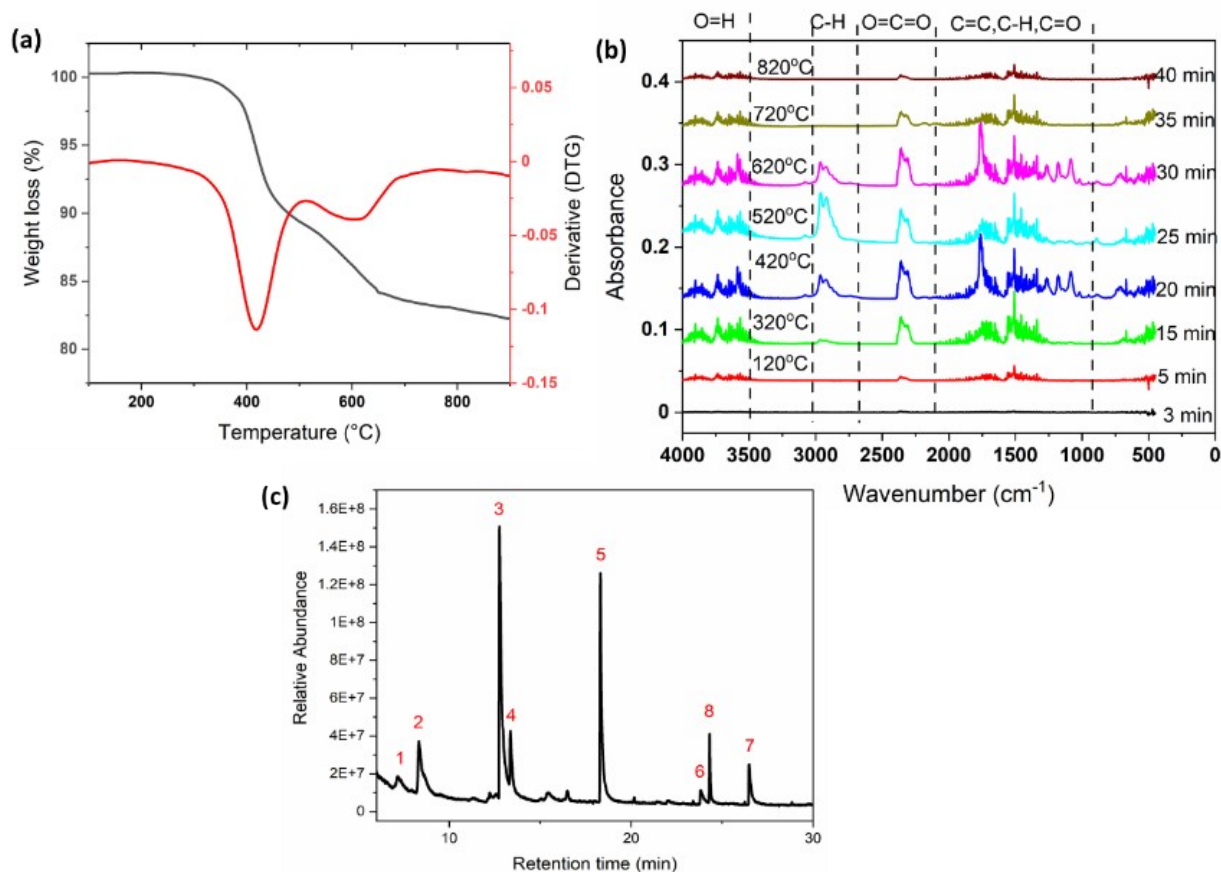

**Figure S1.** (a) Thermogravimetric analysis with derivatives of the FPCB; (b) TGA-FTIR off-gas analysis of FPCB under different temperatures and time; (c) GC-MS analysis of the condensed gas from TDT (at 600°C).

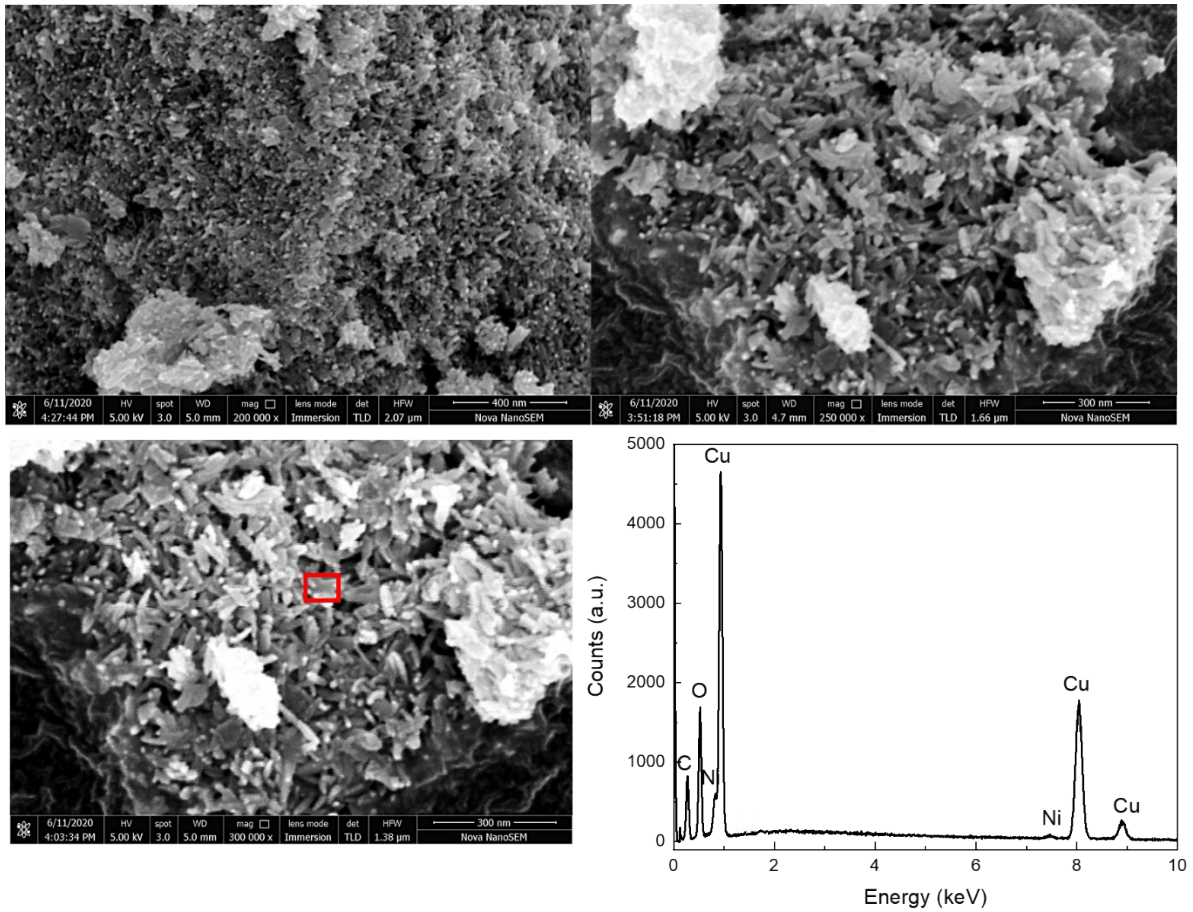

Figure S2. High resolution Secondary Electron Microscopy images and Energy Dispersive X-Ray Spectroscopy of the selected area from CuO nanoflakes.

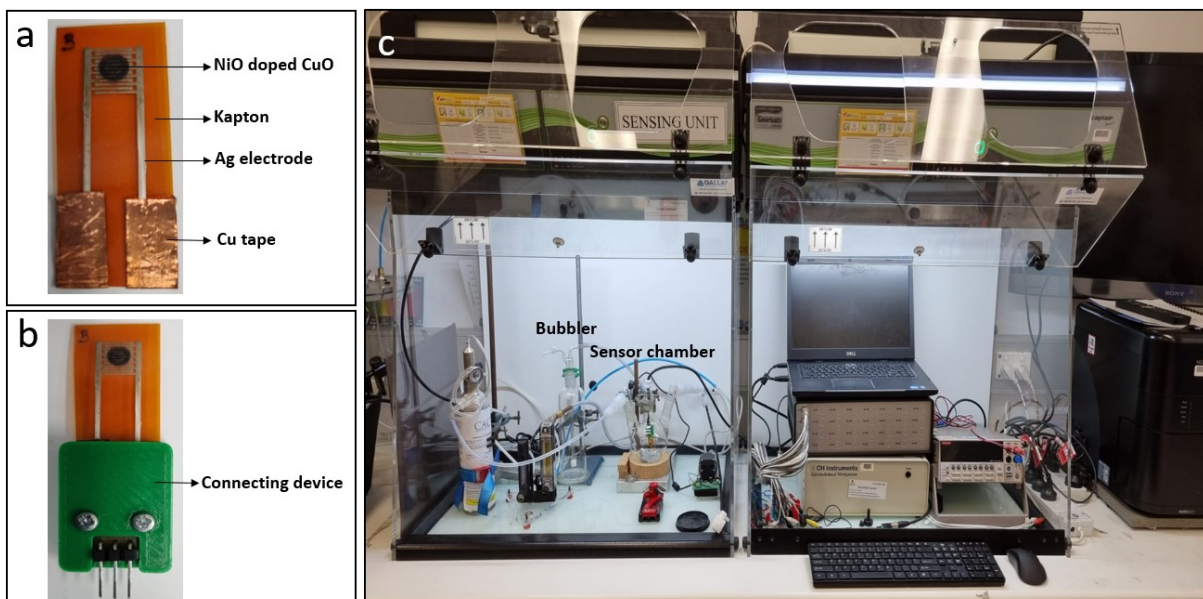

**Figure S3.** Original image of (a), (b) NiO doped CuO based sensor, and (c) gas sensing setup for detecting NH<sub>3</sub> gas.

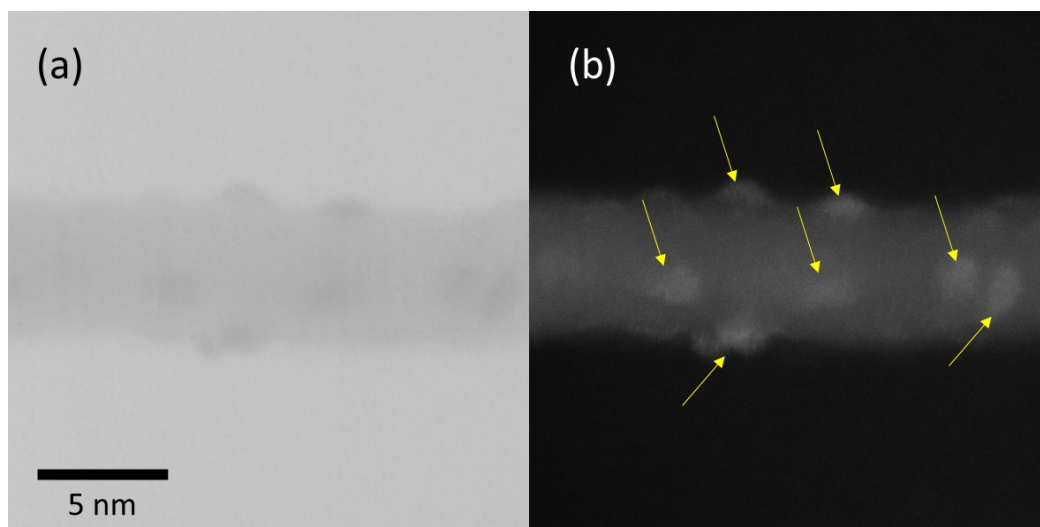

Figure S4. High-resolution STEM (a) bright-field and (b) dark-field images of the NiO doped CuO nanoflakes.

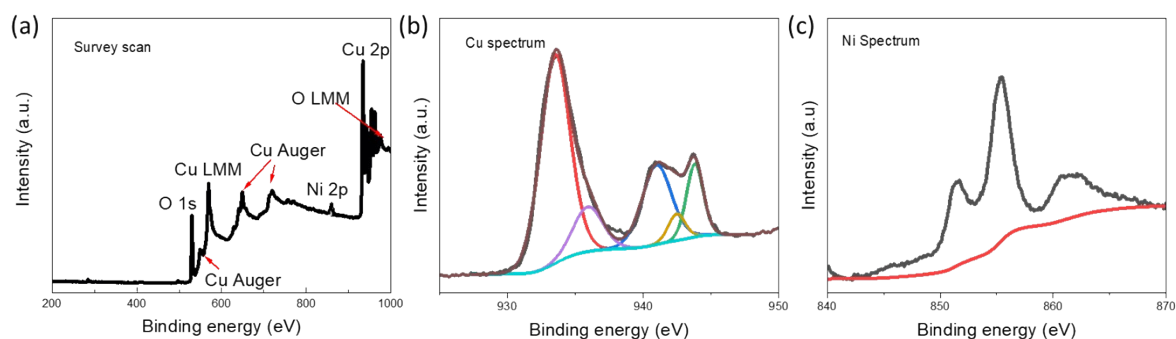

Figure S5: The XPS spectra of the nanoflakes. (a) Survey scan, (b) high resolution Cu spectrum, and (c) high resolution Ni Spectrum.

Table S1: Elemental analysis of the nanoflakes by ICP and XRF.

| ICP     |     | XRF     |     |
|---------|-----|---------|-----|
| Element | Wt% | Element | Wt% |
|         |     |         |     |

|    |       |    |       |
|----|-------|----|-------|
| Cu | 96.05 | Cu | 95.11 |
| Ni | 3.51  | Ni | 4.40  |
| Sn | 0.01  | Sn | 0.01  |
| Na | 0.01  | Na | 0.01  |
| Si | 0.01  | Si | 0.01  |
| Mg | 0.01  | Mg | 0.001 |
| Zn | 0.002 | Zn | 0.004 |
